# Supplementary material for: Synthesis of a functionalized fibrous adsorbent of high uptake capacity: a study on Pb(ii) uptake and simple acidic site model development
Source: Royal Society of Chemistry journal article supplement (doi:10.1039/c5ra20497f), 2016-01-01
Supplement: c5ra20497f1.pdf [file c5ra20497f1.pdf]

## Supplementary Material

### Synthesis of a functionalized fibrous adsorbent of high uptake capacity: A study on Pb(II) uptake and simple acidic site model development

Vihangraj V. Kulkarni, Animes Kumar Golder and Pranab Kumar Ghosh

**Table S1** Proximate & ultimate analyses and BET surface area of RFA and FFA.

| Sample | Proximate analysis, (%) |                 |                  | Ultimate analysis, (%) |      |      |      |      | BET area, (m <sup>2</sup> g <sup>-1</sup> ) |
|--------|-------------------------|-----------------|------------------|------------------------|------|------|------|------|---------------------------------------------|
|        | Ash                     | Volatile matter | Moisture content | C                      | H    | O    | N    | S    |                                             |
| RFA    | 2.93                    | 90.37           | 6.4              | 47.6                   | 6.31 | 45.8 | 0.18 | 0.02 | 1.06                                        |
| FFA    | 3.08                    | 93.91           | 3.01             | 52.7                   | 3.58 | 42.4 | Nil  | 1.23 | 13.69                                       |

**Table S2** Comparison of adsorption capacities of adsorbents prepared using different acids with FFA in present study.

| Precursor             | Modifying agent   | Metal                       | Test conditions                                                                                                                                             | $q_{max}$ , $mg\ g^{-1}$     | Source                   |               |
|-----------------------|-------------------|-----------------------------|-------------------------------------------------------------------------------------------------------------------------------------------------------------|------------------------------|--------------------------|---------------|
| Rice husk             | Tartaric acid     | Cu(II)<br>Pb(II)            | Initial Pb 400-1200 $mg\ L^{-1}$<br>Initial Cu 100-450 $mg\ L^{-1}$<br>Adsorbent dosage 5 $g\ L^{-1}$<br>150 rpm, 4 h, pH 4<br>Langmuir Capacity            | 31.85<br>120.48              | Wong et al., 2003        |               |
| Sawdust (Poplar tree) | Sulfuric acid     | Cu(II)                      | Initial Cu 30-150 $mg\ L^{-1}$<br>Adsorbent dosage 5 $g\ L^{-1}$<br>200 rpm, 1 h, pH 5.5<br>Langmuir Capacity, 1 N $H_2SO_4$ 1:2 (sawdust/ $H_2SO_4$ ; w/v) | 13.95                        | Acar and Eren, 2006      |               |
| Sawdust (Oak tree)    | Hydrochloric acid | Cu(II)<br>Ni(II)<br>Cr(VI)  | 40 $g\ L^{-1}$ , pH 4<br>30 $g\ L^{-1}$ , pH 8<br>60 $g\ L^{-1}$ , pH 3<br>Metal 0.1-100 $mg\ L^{-1}$ , HCl treated adsorbents, Langmuir capacity           | 3.60<br>3.37<br>1.74         | Argun et al., 2007       |               |
| Peanut husk           | Sulfuric acid     | Pb(II)<br>Cr(III)<br>Cu(II) | 5-50 $mg\ L^{-1}$ , pH 4, 200 rpm, dose 2 $g\ L^{-1}$ , Langmuir capacity, Cu and Pb 1 h, Cr 6 h                                                            | 29.14<br>7.67<br>10.15       | Li et al., 2007          |               |
| Wheat bran            | Sulfuric acid     | Cu(II)                      | 150 rpm 2 h, dose 1 $g\ L^{-1}$ , initial Cu 25-250 $mg\ L^{-1}$                                                                                            | 51.5                         | Ozer et al., 2004        |               |
| Banana pith           | Nitric acid       | Cu(II)                      | 5 $g\ L^{-1}$ , 10-100 $mg\ L^{-1}$ , pH 4.4, 200 rpm, Langmuir isotherm                                                                                    | 13.46                        | Low et al., 1995         |               |
| Corn cob              | Nitric acid       | Cd(II)                      | Initial Cd(II) 5-120 $mg\ L^{-1}$ , Adsorbent dose 0.1-1 $g\ L^{-1}$ , pH 6, equilibrium time 5 d                                                           | 19.30                        | Leyva-Ramos et al., 2005 |               |
| Areca nut husk        | Sulphuric acid    | Pb(II)                      | Initial Pb(II) 32 $mg\ L^{-1}$ , pH 5, FFA dose 1 $g\ L^{-1}$ , 30 °C, 5 h 180 rpm                                                                          | After 1 <sup>st</sup> cycle  | 31.47                    | Present study |
|                       |                   |                             |                                                                                                                                                             | After 12 <sup>th</sup> cycle | 194.94                   |               |

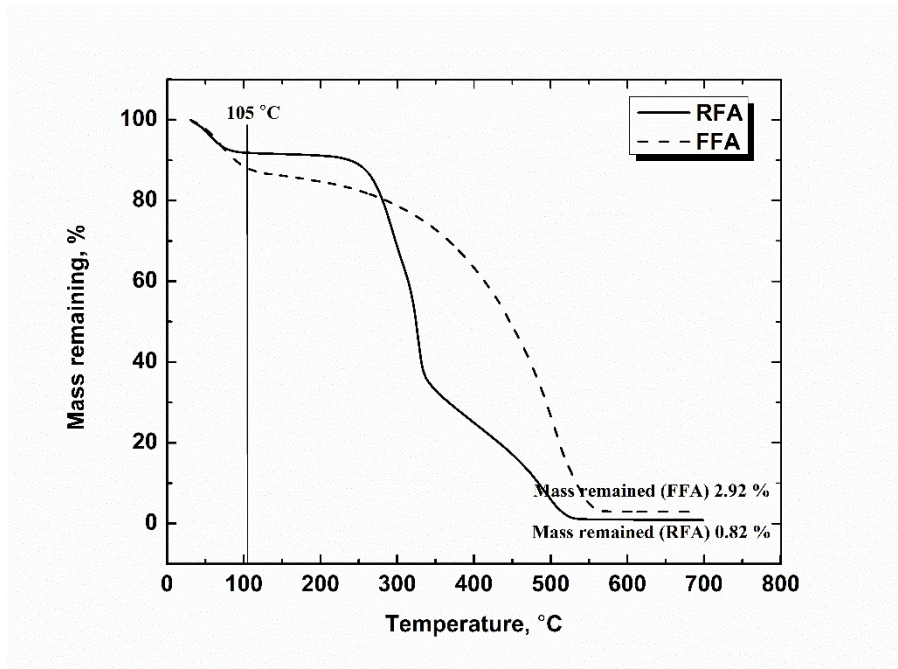

**Fig. S1** Thermogravimetric analysis of RFA and FFA showing its degradation as a function of temperature (range 30-700 °C).

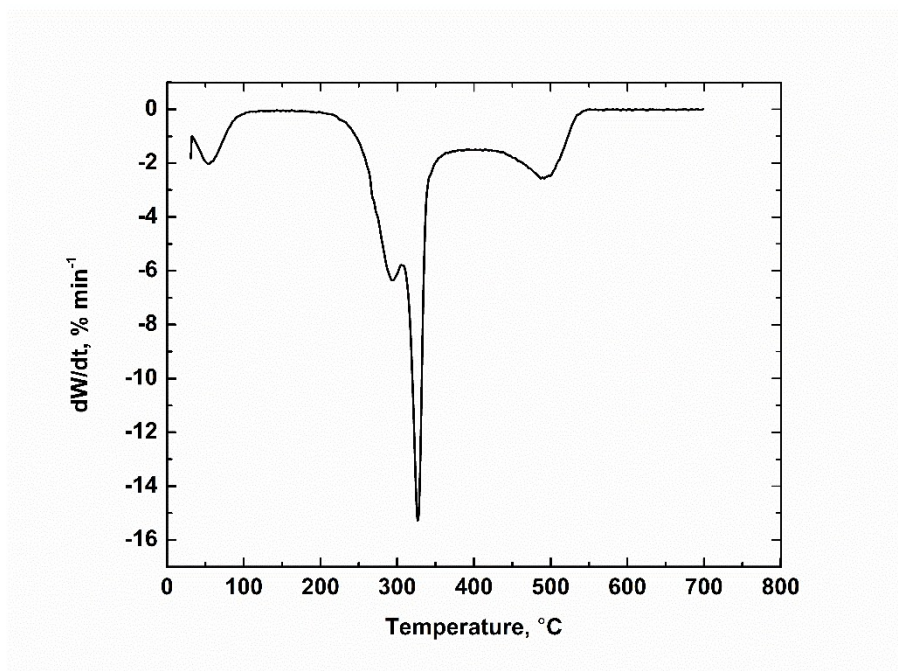

**Fig. S2** Differential thermogravimetric analysis of RFA (range 30-700 °C).

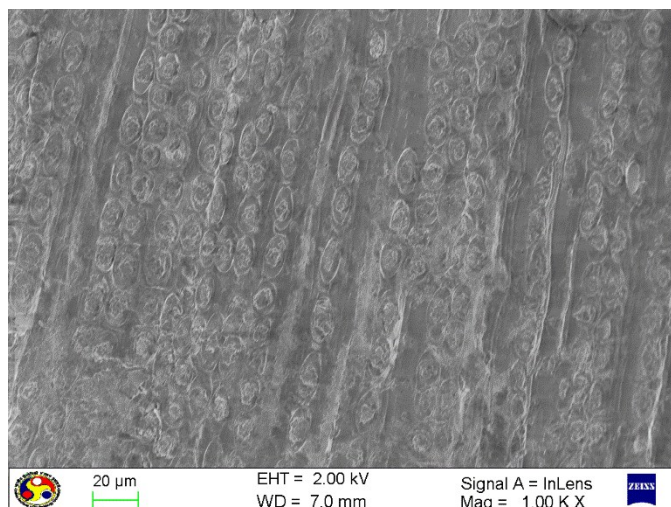

**Fig. S3** FESEM image of RFA (magnification 1000X).

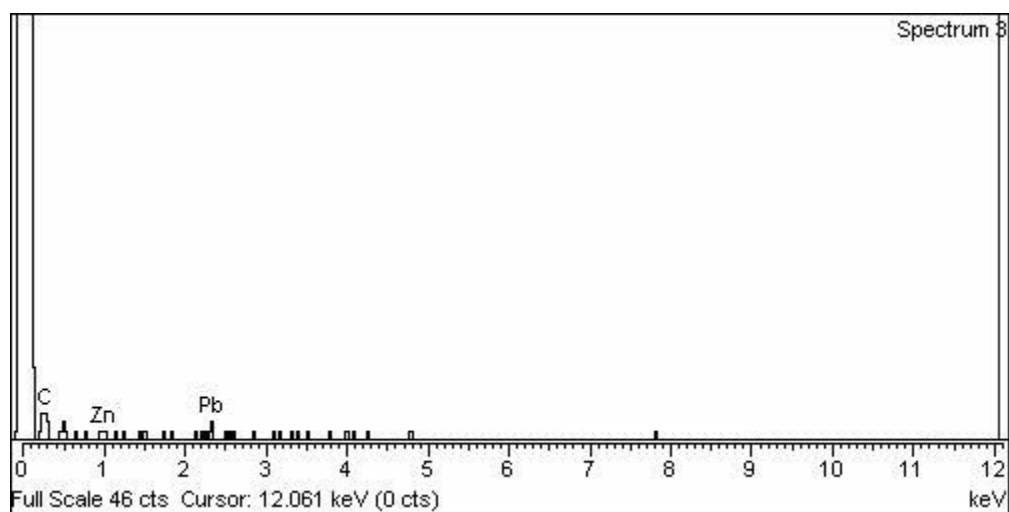

**Fig. S4** EDX spectrum of Pb(II) loaded FFA. Experimental Pb(II) loading of 75 mg per g FFA after 5 h of contact at 30 °C and agitation speed of 180 rpm.

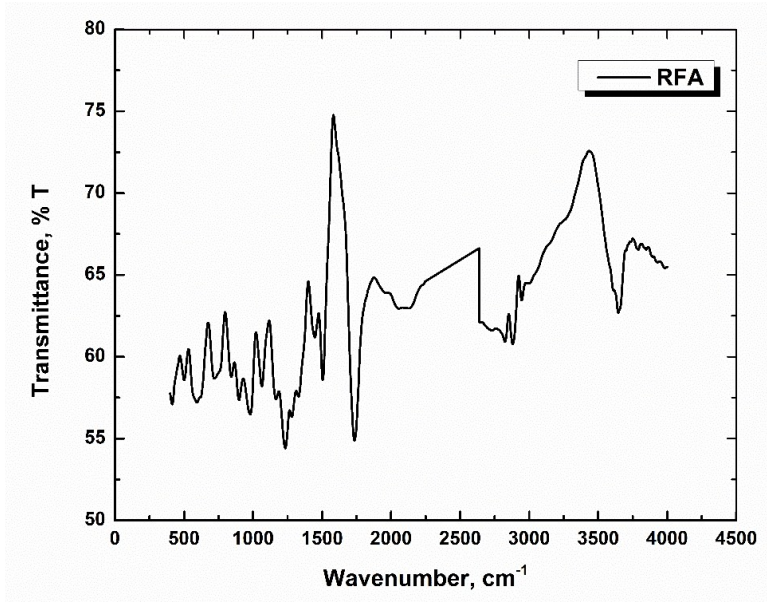

Fig. S5 FTIR spectra of virgin RFA.

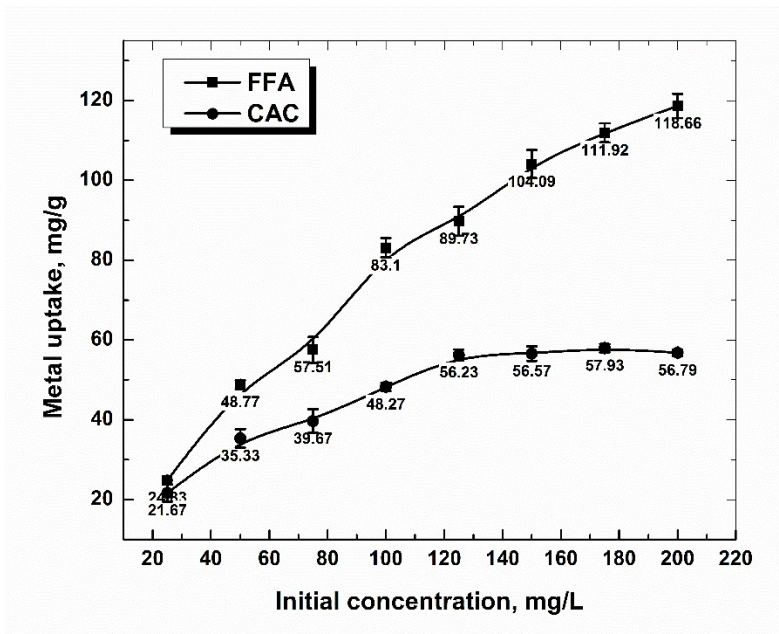

Fig. S6 Pb(II) uptake capacities at different initial concentrations (initial Pb(II) concentration 25 to 200 mg L<sup>-1</sup>, adsorbent dosage 1 g L<sup>-1</sup>, agitation speed 180 rpm, temperature 30 °C, contact/equilibrium time 5 h).

## References

- Acar, F.N., Eren, Z., 2006. Removal of Cu(II) ions by activated poplar sawdust (Samsun Clone) from aqueous solutions. *Journal of Hazardous Materials* 137, 909-914.
- Argun, M.E., Dursun, S., Ozdemir, C., Karatas, M., 2007. Heavy metal adsorption by modified oak sawdust: Thermodynamics and kinetics. *Journal of Hazardous Materials* 141, 77-85.
- Leyva-Ramos, R., Bernal-Jacome, L.A., Acosta-Rodriguez, I., 2005. Adsorption of cadmium(II) from aqueous solution on natural and oxidized corncob. *Separation and Purification Technology* 45, 41-49.
- Li, Q., Zhai, J., Zhang, W., Wang, M., Zhou, J., 2007. Kinetic studies of adsorption of Pb(II), Cr(III) and Cu(II) from aqueous solution by sawdust and modified peanut husk. *Journal of Hazardous Materials* 141, 163-167.
- Low, K.S., Lee, C.K., Leo, A.C., 1995. Removal of metals from electroplating wastes using banana pith. *Bioresource Technology* 51, 227-231.
- Ozer, A., Ozer, D., Ozer, A., 2004. The adsorption of copper(II) ions on to dehydrated wheat bran (DWB): determination of the equilibrium and thermodynamic parameters. *Process Biochemistry* 39, 2183-2191.
- Wong, K.K., Lee, C.K., Low, K.S., Haron, M.J., 2003. Removal of Cu and Pb from electroplating wastewater using tartaric acid modified rice husk. *Process Biochemistry* 39, 437-445.
